# Supplementary material for: Structural basis of nucleosome transcription mediated by Chd1 and FACT
Source: Springer Nature journal article supplement (doi:10.1038/s41594-021-00578-6), 2021-04-01
Supplement: MOESM1 [file 41594_2021_578_MOESM1_ESM.pdf]

**Supplementary information**

---

**Structural basis of nucleosome  
transcription mediated by Chd1 and FACT**

---

In the format provided by the  
authors and unedited

Final PCR product:

■ Non-template DNA  
■ Template DNA

TspRI cut site  
\*\*\*

ACGAAGCGTAGCATCACTGTGTTGTGTTTGGTGTGCTG66GTGGTGGCCGTTTTTCGTTGTTTTTTCTGTCTCGAACCTGGAGACTAGGGAGTAATCCCCTTGGCGGTTAAACGCGGGGACAGCGGTACGTGCGTTTAAAGCGGTGCTAGAGCTGTCTACGACCAATTGAGCGGCCTCGGCACCGGGATTCTGAT  
TGCTTCGCATCTAGTGAACAACAAACACACAGACCACCGCAAAAGCAACAAAAAGACAGAGCTTGGACCTCTGATCCCTCATTAGGGGAACCGCAATTTTGCGCCCTGTGCGCATGCACGCAATTCGCCACGATCTCGACAGATGCTGGTTAACTCGCCGGAGCCGTGGCCCTAAGACTA
